# Supplementary material
Source: Springer Nature journal article supplement (https://www.springermedizin.de/resource/supplementary/12957_2013_1353_MOESM1_ESM.pdf/9562368)

**Percentages of patients**

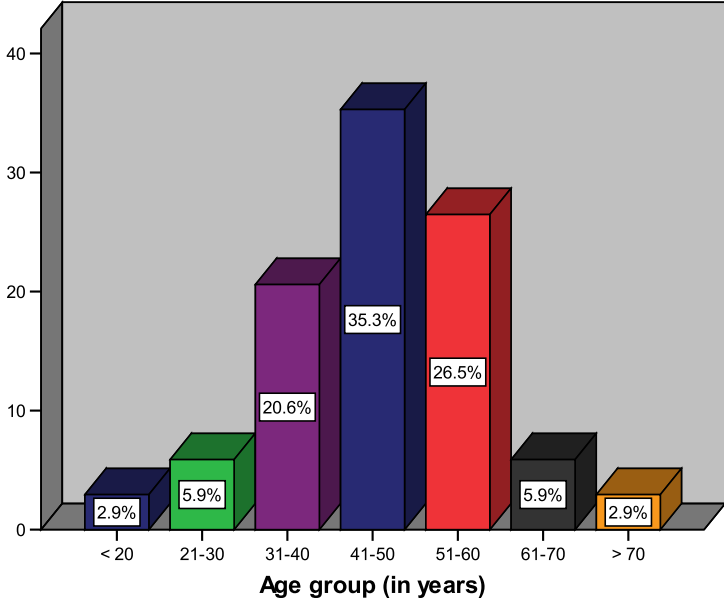

Supplement: MOESM1 [file 9562368]
